# Supplementary material for: External template-assisted self-assembly: design and synthesis of the [MoOS3Cu3]+ based supramolecular polymeric clusters
Source: Royal Society of Chemistry journal article supplement (doi:10.1039/c2ce06518e), 2012-01-01
Supplement: c2ce06518e.pdf [file c2ce06518e.pdf]

## Template-Assisted Self-Assembly: Design and Synthesis of the $[\text{MoOS}_3\text{Cu}_3]^+$ based supramolecular polymeric clusters

Hong-Mei Wang, Yi Han, Yun-Yin Niu,\* Zhen-Hua Zhang, Hong-Wei Hou,\* and Yu Zhu

Department of Chemistry, Zhengzhou University, Zhengzhou 450001, P. R. China.  
 Email: niuyy@zzu.edu.cn

Table S1 Selected bond distances (Å) and angles (deg) for the polymers 1–4<sup>a</sup>

|                               |            |                         |            |                                |            |
|-------------------------------|------------|-------------------------|------------|--------------------------------|------------|
| <b>1</b>                      |            |                         |            |                                |            |
| I(1)-Cu(2)                    | 2.5524(9)  | Mo(1)-O(1)              | 1.706(4)   | Mo(1)-S(1)                     | 2.2518(16) |
| Mo(1)-Cu(1)                   | 2.7171(9)  | Cu(1)-N(4) <sup>1</sup> | 2.046(5)   | Cu(1)-S(2)                     | 2.2835(17) |
| Cu(2)-S(1)                    | 2.3049(15) | Cu(2)-N(2) <sup>2</sup> | 2.176(4)   |                                |            |
| O(1)-Mo(1)-S(1)               | 111.21(17) | S(1)-Mo(1)-S(3)         | 107.48(6)  | Cu(3)-Mo(1)-Cu(2)              | 92.02(2)   |
| O(1)-Mo(1)-Cu(1)              | 127.51(17) | S(1)-Cu(1)-Mo(1)        | 52.50(4)   | N(1)-Cu(1)-Mo(1)               | 121.27(15) |
| N(2)-Cu(2)-I(1)               | 103.32(14) | N(4)-Cu(1)-S(1)         | 110.52(14) | N(4)-Cu(1)-N(1)                | 109.5(2)   |
| <b>2</b>                      |            |                         |            |                                |            |
| Mo(1)-O(1)                    | 1.704(6)   | Mo(1)-S(1)              | 2.261(2)   | Mo(1)-Cu(1)                    | 2.7099(13) |
| I(1)-Cu(1)                    | 2.4266(15) | S(1)-Cu(1)              | 2.263(2)   | Cu(1)-N(1)                     | 2.175(6)   |
| Cu(3)-N(5)#1                  | 2.050(7)   | Cu(3)-N(2)#2            | 2.070(7)   | N(2)-Cu(3)#3                   | 2.070(7)   |
| O(1)-Mo(1)-S(1)               | 110.3(3)   | S(1)-Mo(1)-S(2)         | 108.97(8)  | O(1)-Mo(1)-Cu(2)               | 125.4(2)   |
| S(1)-Mo(1)-Cu(2)              | 54.79(6)   | S(3)-Mo(1)-Cu(2)        | 123.39(6)  | Mo(1)-S(1)-Cu(1)               | 73.60(7)   |
| Cu(2)-Mo(1)-Cu(1)             | 91.51(4)   | N(1)-Cu(1)-S(1)         | 110.0(2)   | N(1)-Cu(1)-Mo(1)               | 109.5(2)   |
| N(4)-Cu(2)-N(3)               | 109.7(3)   |                         |            |                                |            |
| <b>3</b>                      |            |                         |            |                                |            |
| Mo(1)-Cu(1)                   | 2.6806(8)  | Mo(1)-S(1)              | 2.2676(15) | Mo(1)-O(1)                     | 1.699(4)   |
| Br(1)-Cu(3)                   | 2.4278(9)  | Cu(1)-S(1)              | 2.2921(16) | Cu(1)-N(1)                     | 2.016(4)   |
| Cu(2)-N(2) <sup>1</sup>       | 2.065(4)   | Cu(3)-N(5) <sup>2</sup> | 2.182(4)   |                                |            |
| Cu(1)-Mo(1)-Cu(2)             | 88.08(3)   | S(1)-Mo(1)-Cu(1)        | 54.42(4)   | S(1)-Mo(1)-S(2)                | 108.36(6)  |
| S(2)-Mo(1)-Cu(3)              | 126.28(4)  | O(1)-Mo(1)-Cu(1)        | 125.79(16) | O(1)-Mo(1)-S(1)                | 110.90(17) |
| S(1)-Cu(1)-Mo(1)              | 53.57(4)   | S(2)-Cu(1)-S(1)         | 107.52(6)  | N(2) <sup>1</sup> -Cu(2)-Mo(1) | 128.83(14) |
| N(2) <sup>1</sup> -Cu(2)-S(3) | 110.02(14) | Br(1)-Cu(3)-Mo(1)       | 146.90(3)  | N(5) <sup>2</sup> -Cu(3)-Br(1) | 102.65(13) |
| <b>4</b>                      |            |                         |            |                                |            |
| Mo(1)-O(1)                    | 1.710(4)   | Mo(1)-S(1)              | 2.2618(19) | Mo(1)-Cu(1)                    | 2.6834(10) |
| Cu(1)-N(1)                    | 2.048(5)   | Cu(1)-S(1)              | 2.2842(18) | Cu(3)-N(5)#1                   | 2.043(5)   |
| Cu(3)-N(2)#2                  | 2.107(5)   |                         |            |                                |            |
| O(1)-Mo(1)-S(1)               | 110.7(2)   | S(1)-Mo(1)-S(3)         | 108.16(6)  | O(1)-Mo(1)-Cu(3)               | 129.56(19) |
| S(1)-Mo(1)-Cu(3)              | 119.78(5)  | S(2)-Mo(1)-Cu(3)        | 54.46(5)   | Cu(1)-Mo(1)-Cu(2)              | 89.43(3)   |
| N(1)-Cu(1)-N(3)               | 105.94(18) | N(1)-Cu(1)-S(3)         | 116.14(15) | N(1)-Cu(1)-Mo(1)               | 134.23(13) |
| N(5)#1-Cu(3)-N(2)#2           | 99.8(2)    | Mo(1)-S(1)-Cu(1)        | 72.35(6)   | Cu(1)-S(1)-Cu(2)               | 111.65(7)  |

---

Cu(2)-S(2)-Cu(3) 106.78(7) Cu(3)-S(3)-Mo(1) 72.25(5)

<sup>a</sup>Symmetry transformations used to generate equivalent atoms for **1**: <sup>1</sup>1-X, +Y, 1/2-Z; <sup>2</sup>1/2-X, -1/2+Y, -1/2-Z. For **2**: #1: -x+1, y, -z+3/2. #2: -x+1/2, y+1/2, -z+1/2. #3: -x+1/2, y-1/2, -z+1/2. For **3**: <sup>1</sup>-X, +Y, 1/2-Z; <sup>2</sup>1/2-X, -1/2+Y, 3/2-Z. For **4**: #1: x, -y+2, z-1/2. #2: -x+1/2, -y+1/2, -z.

---

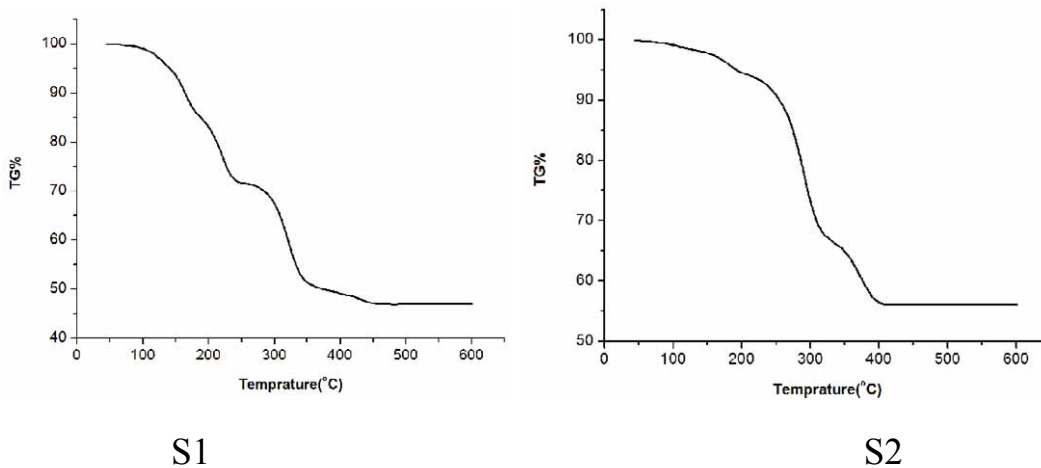

**Fig. S1:** The TG curve of compound **1**. **S2:** The TG curve of compound **2**.
